# Supplementary material for: Homogenous 96-Plex PEA Immunoassay Exhibiting High Sensitivity, Specificity, and Excellent Scalability
Source: PLoS One. 2014 Apr 22;9(4):e95192. doi: 10.1371/journal.pone.0095192 (PMC3995906; doi:10.1371/journal.pone.0095192)
Supplement: Table S1 — Panel description, sensitivity parameters, and specificity data. (XLSX) [file pone.0095192.s002.xlsx]

## Sheet: Table S1
Table S1: Panel description, sensitivity parameters, and specificity data
Protein	Sequence	Antibodies	LOD (pg/ml)ᵃ	LLOQ (pg/ml)ᵇ	ULOQ (pg/ml)ᶜ	Mix No.	Mix 1	Mix 2	Mix 3	Mix 4	Mix 5	Mix 6	Mix 7	Mix 8	All Ag	dNPXᵈ
Interleukin 8 (IL-8)	1	Goat pAb / Goat pAb	0.238419	0.238419	3906.25	1	13.9031	0.244093	0.171809	0.106886	-0.231045	0.148174	0.156287	0.343549	14.1656	0.262431
Vascular endothelial growth factor A (VEGF-A)	2	Goat pAb / Goat pAb	3.8147	15.2588	15625	1	10.2138	0.106819	0.242489	-0.0467666	-0.0181625	0.124021	0.196304	0.66712	10.3381	0.124329
Adrenomedullin (AM)	3	Goat pAb / Goat pAb	976.562	976.562	250000	1	4.15398	-0.1251	-0.00172773	-0.0104377	-0.168769	0.061528	0.0651972	0.160793	3.4004	-0.753582
Incubation Control 1 (GFP)	4	Goat pAb / Goat pAb	-	-	-	-	-	-	-	-	-	-	-	-	-	-
CD40 ligand (CD40-L)	5	Goat pAb / Goat pAb	3.8147	15.2588	15625	1	10.7084	0.167106	0.0885606	-0.0807191	0.12342	0.218015	0.0656146	0.089843	10.8516	0.143213
Growth/differentiation factor 15 (GDF-15)	6	Goat pAb / Goat pAb	61.0352	244.141	62500	1	5.45572	0.0207049	0.0122722	0.00937865	-0.00338455	0.156768	0.0219965	0.514419	5.68615	0.230427
Placenta Growth Factor (PlGF)	7	Goat pAb / Goat pAb	0.0149012	0.238419	15625	1	10.5241	-0.0190815	-0.0891126	-0.113489	0.0512315	0.0326897	-0.0190121	0.349412	10.7249	0.200776
E-selectin (SELE)	8	Sheep pAb / Sheep pAb	976.562	976.562	250000	1	1.14777	-0.189542	-0.0477664	-0.061087	-0.0762792	0.0815258	0.115611	0.240172	1.16695	0.0191727
Epidermal growth factor (EGF)	9	Goat pAb / Goat pAb	3.8147	3.8147	3906.25	1	11.2	0.131984	-0.0676819	-0.00568893	0.0467972	0.0608842	0.102878	0.398686	11.4158	0.215855
Osteoprotegerin (OPG )	10	Goat pAb / Goat pAb	0.953674	3.8147	15625	1	11.5775	0.0704772	-0.0871024	0.101522	-0.0368781	0.0394694	0.118131	0.275849	11.6862	0.108632
Interferon gamma (IFN-gamma)	11	Goat pAb / Goat pAb	15.2588	61.0352	62500	1	6.45527	0.0143682	-0.106901	-0.127497	-0.00837671	0.0374977	-0.00664676	-0.0103758	6.70715	0.251881
Interleukin 1 receptor antagonist protein (IL-1ra)	12	Goat pAb / Goat pAb	0.238419	15.2588	15625	2	-0.106342	8.05012	-0.163072	-0.0678945	-0.0902529	0.160543	-0.0288861	-0.104086	8.17732	0.1272
Interleukin 6 (IL-6)	13	Goat pAb / Goat pAb	0.953674	0.953674	15625	2	0.00632813	13.4436	-0.0843264	-0.0422795	-0.0809489	0.0492045	-0.0338383	0.21208	13.5285	0.0848893
Cystatin B (CSTB)	14	Goat pAb / Goat pAb	244.141	244.141	250000	2	-0.214627	3.01912	-0.103571	-0.229171	-0.0341947	-0.181327	0.115363	-0.0306414	3.05949	0.0403641
Monocyte chemotactic protein-1 (MCP-1)	15	Goat pAb / Goat pAb	0.953674	0.953674	3906.25	2	-0.0951169	12.771	-0.107081	0.08236	0.0557281	0.00381029	0.382299	0.215117	12.8908	0.119801
Kallikrein-6 (KLK6 )	16	Goat pAb / Goat pAb	61.0352	244.141	62500	2	0.0739606	6.71725	-0.121609	-0.337667	-0.363913	0.177123	0.50562	0.626394	6.76787	0.0506198
Galectin-3 (Gal-3)	17	Goat pAb / Goat pAb	15625	15625	250000	2	-0.0305368	0.562674	0.0442142	0.165557	-0.154959	0.0771971	0.211862	0.204984	0.548398	-0.0142754
Erythropoietin (EPO)	18	Goat pAb / Goat pAb	244.141	244.141	62500	2	-0.0515637	4.17411	-0.0179866	0.0840566	-0.0445353	-0.00860966	0.0470523	-0.0759065	4.30029	0.126178
Extension Control	19	Goat pAb	-	-	-	-	-	-	-	-	-	-	-	-	-	-
Latency-associated peptideTGF beta-1 (LAP TGF-beta-1)	20	Goat pAb / Goat pAb	976.562	976.562	62500	2	0.112346	4.03557	0.0285787	0.0389703	-0.00327574	0.13225	0.0676027	-0.0153652	3.96564	-0.0699255
Kallikrein-11 (hK11)	21	Goat pAb / Goat pAb	0.238419	61.0352	15625	2	0.0601404	7.34377	-0.0479875	0.0501478	-0.0718927	0.357608	0.113733	-0.16554	7.48305	0.139283
Angiopoietin-1 receptor (TIE2)	22	Goat pAb / Goat pAb	976.562	976.562	250000	2	-0.0871545	1.25042	0.0544468	-0.171325	-0.0459511	0.0962437	0.0273482	0.0890934	1.32492	0.0745009
Tissue Factor (TF)	23	Goat pAb / Goat pAb	3.8147	3.8147	15625	3	-0.163972	-0.17335	9.22207	-0.071299	-0.0561235	0.0224474	0.0712413	0.103353	9.25683	0.0347647
Tumor necrosis factor receptor 1 (TNF-R1)	24	Goat pAb / Goat pAb	3.8147	15.2588	15625	3	-0.173908	-0.211733	11.4671	-0.12092	-0.211193	0.0467765	0.0365184	0.109744	11.2764	-0.190618
Platelet-derived growth factor subunit B (PDGF subunit B)	25	Goat pAb / Goat pAb	244.141	244.141	250000	3	-0.0965603	-0.115271	5.64355	-0.174091	-0.085485	0.107667	0.104783	0.492553	5.66613	0.0225889
Granulocyte-macrophage colony-stimulating factor (GM-CSF)	26	Goat pAb / Goat pAb	976.562	976.562	62500	3	0.0812962	0.0709285	1.81556	0.0914711	0.0418398	0.0592184	0.0745962	0.0080768	1.82714	0.0115818
Macrophage colony-stimulating factor 1 (CSF-1)	27	Goat pAb / Goat pAb	0.953674	3.8147	15625	3	-0.0965555	-0.015031	11.2967	-0.0155675	0.0421705	0.0734579	0.107106	-0.0867813	11.4225	0.125729
C-X-C motif chemokine 11 (CXCL11 )	28	Goat pAb / Goat pAb	61.0352	61.0352	15625	3	-0.104646	-0.192129	8.70251	-0.0909002	-0.244449	-0.0313303	0.187293	-0.0388521	8.58204	-0.12047
Interleukin 12 (IL-12)	29	Goat pAb / Goat pAb	3.8147	3.8147	15625	3	-0.129372	-0.213014	10.1144	-0.0168067	-0.114084	-0.00235484	-0.0713887	0.238121	10.0888	-0.0255733
Interleukin 2 (IL-2)	30	Goat pAb / Goat pAb	244.141	244.141	250000	3	-0.0559337	0.0701532	3.90233	0.201544	0.0926583	0.169763	0.154159	0.206641	4.19278	0.290448
Interleukin 7 (IL-7)	31	Goat pAb / Goat pAb	15.2588	15.2588	15625	3	-0.0248109	-0.0796281	9.56603	-0.0335529	0.0021627	0.0591375	0.0330941	0.240223	9.66601	0.0999759
Stem cell factor (SCF)	32	Goat pAb / Goat pAb	15.2588	15.2588	62500	3	-0.195771	-0.155442	7.48998	0.203328	-0.053821	-0.0506018	0.10548	0.0659264	7.59356	0.103578
C-X-C motif chemokine 9 (CXCL9 )	33	Goat pAb / Goat pAb	15.2588	15.2588	15625	4	0.0544602	-0.0715655	-0.020893	8.79622	-0.0182137	0.131657	0.00491011	-0.0297423	8.72788	-0.0683436
Interleukin 6 receptor subunit alpha (IL-6RA)	34	Goat pAb / Goat pAb	976.562	976.562	250000	4	-0.301942	-0.202694	-0.109214	2.40133	0.14228	-0.173131	0.118157	-0.177636	2.34658	-0.0547497
Tumor necrosis factor receptor 2 (TNF-R2)	35	Goat pAb / Goat pAb	3906.25	3906.25	250000	4	0.0708518	0.113885	0.00528983	0.885755	0.140098	0.103334	0.172698	0.124016	0.776447	-0.109308
Matrix metalloproteinase-3 (MMP-3)	36	Goat pAb / Goat pAb	3906.25	-	-	4	0.0199326	0.0862093	0.0549531	0.317788	0.148203	0.0684499	0.0746808	-0.0308059	0.327602	0.00981374
Interleukin 2 receptor subunit alpha (IL2RA)	37	Goat pAb / Goat pAb	0.953674	3.8147	3906.25	4	-0.0889417	-0.0668853	0.0248399	10.6574	-0.019815	0.0461654	0.147527	0.121276	10.7114	0.05397
Tumor necrosis factor ligand superfamily member 14 (TNFSF14 )	38	Goat pAb / Goat pAb	61.0352	61.0352	62500	4	-0.134988	-0.0240198	-0.0675572	8.07334	1.43346	0.0941467	1.10175	0.00317939	8.06287	-0.010467
Prolactin (PRL)	39	Goat pAb / Goat pAb	3906.25	3906.25	250000	4	-0.130946	0.0753274	0.0973747	0.742335	-0.00398193	0.125556	0.086087	-0.0641159	0.716076	-0.0262599
Myeloperoxidase (MPO)	40	Goat pAb / Goat pAb	976.562	976.562	250000	4	-0.025541	0.00367256	0.0542094	2.89754	0.087349	0.10375	0.0463009	-0.0793438	2.77011	-0.127426
Growth Hormone (GH)	41	Goat pAb / Goat pAb	3.8147	3.8147	15625	4	-0.117581	-0.101299	0.148469	10.8272	0.0924857	0.216853	0.209141	0.109491	10.8024	-0.0248406
Fas antigen ligand (FasL)	42	Goat pAb / Goat pAb	15.2588	15.2588	15625	4	-0.0700546	-0.0476825	-0.101363	6.51804	0.0410039	0.0163607	0.0295221	0.0110558	6.51921	0.00117253
B-cell activating factor (BAFF)	43	Goat pAb / Goat pAb	244.141	244.141	250000	5	0.0175424	0.0506918	-0.116596	0.00276301	5.03549	0.156419	0.133998	0.200515	5.25786	0.22237
Tumor necrosis factor receptor superfamily member 6 (Fas )	44	Goat pAb / Goat pAb	244.141	244.141	250000	5	-0.200788	-0.151438	-0.18595	-0.0616858	4.20347	-0.0694562	-0.0274654	-0.154744	4.14783	-0.0556372
C-C motif chemokine 19 (CCL19)	45	Goat pAb / Goat pAb	15.2588	15.2588	15625	5	-0.0826418	-0.154931	-0.0103378	0.0257743	11.5567	0.171445	0.130909	-0.185821	11.6492	0.0924851
Incubation Control 2 (PE)	46	Goat pAb / Goat pAb	-	-	-	-	-	-	-	-	-	-	-	-	-	-
Detection Control	47	-	-	-	-	-	-	-	-	-	-	-	-	-	-	-
Estrogen receptor (ER )	48	Sheep pAb / Sheep pAb	3906.25	3906.25	250000	5	-0.00373208	-0.0850489	-0.162752	-0.0808725	2.43397	-0.0859357	-0.078519	-0.0659083	2.19876	-0.235209
Extracellular matrix metalloproteinase inducer (EMMPRIN)	49	Goat pAb / Goat pAb	3.8147	3.8147	15625	5	0.0764001	0.105638	0.0775363	0.148619	9.98079	0.474515	0.362585	0.466904	10.2342	0.253405
Carbonic Anhydrase IX (CAIX)	50	Goat pAb / Goat pAb	61.0352	61.0352	15625	5	-0.101741	-0.065063	0.295539	-0.226755	7.19717	0.330924	-0.0511359	0.237423	7.24317	0.0459954
C-X-C motif chemokine 10 (CXCL10 )	51	Goat pAb / Goat pAb	15.2588	15.2588	15625	5	-0.102229	-0.0381795	-0.000942906	0.082629	9.77531	-0.115565	0.335295	0.00802395	9.75511	-0.0202023
Epithelial cell adhesion molecule (Ep-CAM)	52	Goat pAb / Goat pAb	3.8147	3.8147	15625	5	-0.0322221	0.206012	0.0256672	-0.0991544	12.5463	0.147476	0.0188412	0.0909739	12.58	0.0337167
Receptor tyrosine-protein kinase ErbB-2 (ErbB2/Her2)	53	Goat pAb / Goat pAb	61.0352	61.0352	15625	5	-0.0946963	-0.12931	-0.043068	0.0657751	5.08972	0.0476548	0.0548164	-0.0627661	5.21912	0.129396
Receptor tyrosine-protein kinase ErbB-3 (ErbB3/Her3)	54	Goat pAb / Goat pAb	61.0352	61.0352	15625	5	-0.0328101	-0.0600857	0.218738	0.146954	5.71958	0.151631	0.132856	-0.0828215	5.99539	0.275811
Receptor tyrosine-protein kinase ErbB-4 (ErbB4/Her4)	55	Goat pAb / Goat pAb	61.0352	61.0352	62500	6	0.154442	-0.303245	0.177446	-0.222675	-0.0950813	6.8129	0.243616	0.249384	6.99758	0.184677
Hepatocyte growth factor (HGF)	56	Goat pAb / Goat pAb	15.2588	15.2588	15625	6	-0.0850749	0.0290508	0.0442063	-0.0223539	0.0547121	4.53453	0.111064	0.0578953	4.56274	0.0282114
Prostate-specific antigen (PSA)	57	Goat pAb / Goat pAb	61.0352	61.0352	15625	6	0.103718	0.119622	0.00708457	-0.0657581	0.149868	3.7654	0.177306	-0.0579793	3.94646	0.181067
Myeloid differentiation primary response protein MyD88 (MYD88 )	58	Goat pAb / Goat pAb	976.562	976.562	250000	6	-0.186233	-0.292528	-0.244796	-0.158958	0.0425402	5.04615	-0.048799	0.233151	5.19676	0.15061
Melanoma-derived growth regulatory protein (MIA)	59	Goat pAb / Goat pAb	244.141	244.141	62500	6	-0.203475	-0.0550612	-0.164445	-0.0263449	0.0571007	3.65855	0.16958	-0.0472195	3.61205	-0.0465009
C-C motif chemokine 24 (CCL24 )	60	Goat pAb / Goat pAb	3.8147	3.8147	976.562	6	-0.0610437	0.00517009	-0.000946515	0.0494478	0.136828	8.26553	-0.0284283	-0.0853624	8.33271	0.0671821
Midkine (MK)	61	Goat pAb / Goat pAb	976.562	976.562	62500	6	-0.209677	-0.274846	-0.171929	-0.149318	0.0359309	3.97304	0.0526435	0.0174874	4.10564	0.132598
Urokinase plasminogen activator surface receptor (U-PAR)	62	Goat pAb / Goat pAb	3.8147	15.2588	15625	6	-0.171697	-0.0784121	-0.0357727	-0.171371	-0.080278	8.89618	-0.0362978	-0.123089	8.88942	-0.00676125
C-X-C motif chemokine 5 (CXCL5 )	63	Goat pAb / Goat pAb	15.2588	15.2588	15625	6	-0.0949089	-0.00401939	-0.0124681	-0.0432699	0.0593618	8.78752	-0.0488818	0.118824	8.78835	0.000834202
Cathepsin D (CTSD )	64	Goat pAb / Goat pAb	3906.25	-	-	6	-0.0616333	-0.0205139	0.105296	0.207636	-0.0133537	0.161452	0.155219	-0.175541	0.233949	0.0724974
Betacellulin (BTC)	65	Goat pAb / Goat pAb	61.0352	61.0352	15625	7	-0.10837	-0.03848	-0.075246	-0.0748832	0.0957185	0.0129269	5.74438	-0.0356508	5.80489	0.0605146
Epiregulin (EPR)	66	Goat pAb / Goat pAb	61.0352	61.0352	15625	7	-0.229853	-0.170063	-0.165375	0.0246226	0.0205782	-0.0601626	6.49426	-0.129756	6.52285	0.0285895
Fms-related tyrosine kinase 3 ligand (Flt3L)	67	Goat pAb / Goat pAb	0.953674	0.953674	3906.25	7	-0.182139	-0.165269	-0.322452	-0.077817	0.122606	0.130672	11.3432	0.224759	11.4551	0.111863
Vascular endothelial growth factor receptor 2 (VEGFR-2)	68	Goat pAb / Goat pAb	244.141	244.141	62500	7	-0.115684	0.042233	0.032164	-0.0372249	0.157097	0.0908407	2.53501	-0.122632	3.00703	0.472029
C-C motif chemokine 21 (CCL21 )	69	Goat pAb / Goat pAb	61.0352	61.0352	976.562	7	-0.0990953	-0.17062	-0.571954	-0.189147	-0.200568	-0.142059	8.68861	0.32417	8.64043	-0.0481715
Caspase-3 (CASP-3)	70	Goat pAb / Goat pAb	61.0352	61.0352	62500	7	-0.049928	0.108579	0.250801	0.142493	0.160639	0.0800768	7.94806	0.0664141	8.04787	0.0998157
Early activation antigen CD69 (CD69 )	71	Goat pAb / Goat pAb	15.2588	15.2588	62500	7	-0.222334	-0.223734	-0.10932	-0.0603827	-0.0104122	0.0292274	8.20359	0.0439307	8.28235	0.0787627
Tumor necrosis factor receptor superfamily member 4 (TNFRSF4 )	72	Sheep pAb / Sheep pAb	15.2588	15.2588	15625	7	0.0363707	-0.121813	0.0652625	-0.0705867	0.258384	0.189121	7.0694	0.0983485	7.11102	0.041626
Tartrate-resistant acid phosphatase type 5 (TR-AP)	73	Sheep pAb / Sheep pAb	244.141	976.562	250000	7	-0.057478	-0.0750526	-0.0393483	0.0896142	0.139652	-0.00352528	2.22612	-0.0597164	2.44258	0.216456
Tumor necrosis factor ligand superfamily member 8 (CD30-L)	74	Goat pAb / Goat pAb	61.0352	61.0352	15625	7	-0.0671083	0.102146	0.0436917	0.0987882	0.208787	0.0570897	4.3137	-0.107054	4.43768	0.123982
Regenerating islet-derived protein 4 (REG-4)	75	Goat pAb / Goat pAb	976.562	976.562	250000	8	-0.092403	-0.0840098	-0.102705	-0.2095	-0.00469692	-0.00479027	0.205504	0.271269	0.432648	0.161379
Transforming growth factor alpha (TGF-alpha)	76	Goat pAb / Goat pAb	3.8147	3.8147	15625	8	-0.111841	0.0285227	0.225166	0.11742	0.115625	0.264899	0.160964	9.94577	10.3243	0.378575
Amphiregulin (AR)	77	Goat pAb / Goat pAb	15.2588	15.2588	15625	8	-0.0512906	0.0778403	0.0125959	0.0287225	-0.195447	-0.0667755	0.176167	10.3619	10.7991	0.437208
Heparin-binding EGF-like growth factor (HB-EGF)	78	Goat pAb / Goat pAb	0.953674	0.953674	3906.25	8	-0.177425	0.0730288	-0.0272067	-0.090508	-0.0438309	-0.0171483	0.161351	11.4401	11.7034	0.26333
MHC class I polypeptide-related sequence A (MIC-A)	79	Goat pAb / Goat pAb	61.0352	61.0352	62500	8	0.000946928	-0.101759	-0.0147867	-0.208437	-0.0524713	-0.0494445	0.0514782	4.41125	4.6584	0.247152
Interleukin 4 (IL-4)	80	Goat pAb / Goat pAb	3.8147	3.8147	15625	8	0.0195835	-0.0280077	0.00830572	0.0137606	0.185296	0.0987599	0.280258	10.3895	10.8025	0.413058
Vascular endothelial growth factor D (VEGF-D)	81	Goat pAb / Goat pAb	61.0352	61.0352	62500	8	-0.0470462	-0.0929342	-0.0969156	-0.0558657	-0.0768968	-0.0359033	0.185495	6.58724	6.95989	0.372656
Epididymal secretory protein E4 (HE4 )	82	Sheep pAb / Sheep pAb	61.0352	61.0352	62500	8	0.0156574	0.0821167	0.0165891	0.0350446	0.0391487	0.107387	-0.0041999	4.3692	4.73646	0.367264
C-X-C motif chemokine 13 (CXCL13 )	83	Goat pAb / Goat pAb	3.8147	3.8147	976.562	8	-0.209822	0.0262769	-0.00524053	-0.00199255	-0.137324	0.172409	0.053381	10.5761	10.7407	0.164557
Epidermal growth factor receptor (EGFR )	84	Goat pAb / Goat pAb	3906.25	3906.25	250000	8	-0.0325001	-0.0408675	-0.0646579	0.0556514	0.119692	0.0315216	0.0772151	0.760638	0.89565	0.135012
Hepatocyte growth factor receptor (HGF receptor)	85	Goat pAb / Goat pAb	244.141	244.141	62500	8	-0.0896146	-0.0827372	-0.0126752	0.0506011	-0.0577264	0.113602	0.2135	4.39127	4.5304	0.139132
Thrombopoietin (THPO)	86	Goat pAb / Goat pAb	244.141	244.141	62500	8	-0.132952	-0.481223	0.00520731	-0.382671	-0.231637	0.0896766	-0.00439088	4.67488	4.77564	0.100757
Fatty acid binding protein 4 adipocyte (FABP4)	87	Goat pAb / Goat pAb	976.562	976.562	250000	8	-0.207333	0.0206237	0.144831	-0.0848705	-0.378202	-0.203564	0.157756	1.98126	2.01051	0.0292489
Carcinoembryonic antigen (CEA)	88	Mouse mAb / Mouse mAb	244.141	244.141	62500	8	-0.0577105	-0.0451254	0.0133538	0.134435	-0.228185	-0.138084	0.0654176	5.00525	4.8676	-0.137645
Tumor necrosis factor alpha (TNF)	89	Goat pAb / Goat pAb	244.141	244.141	250000	8	-0.0558604	-0.459441	-0.12478	-0.219147	0.00663299	-0.349899	-0.0568876	6.20573	6.29864	0.0929102
CA242 tumor marker (CA242)	90	Mouse mAb / Mouse mAb	15625	-	-	-	-	-	-	-	-	-	-	-	-	-
Ovarian cancer-related tumor marker 125 (CA-125)	91	Mouse mAb / Mouse mAb	976.562	-	-	-	-	-	-	-	-	-	-	-	-	-
Prostasin (PRSS8 )	92	Sheep pAb / Sheep pAb	0.238419	15.2588	15625	8	-0.00656444	-0.0198641	-0.082098	-0.156222	-0.116352	0.231602	0.214482	8.10199	8.19157	0.0895858
Follistatin (FS)	93	Goat pAb / Goat pAb	244.141	244.141	250000	8	-0.0674738	-0.221948	-0.262362	-0.0792017	-0.125111	0.12094	0.236893	4.90121	4.83121	-0.0699947
Platelet endothelial cell adhesion molecule (PECAM-1)	94	Sheep pAb / Sheep pAb	976.562	976.562	62500	8	0.0336286	-0.0618792	-0.0799522	-0.126413	-0.074088	0.0886768	0.166984	1.61837	1.47543	-0.142946
Interleukin 17 receptor B (IL17RB )	95	Goat pAb / Goat pAb	61.0352	61.0352	62500	8	-0.0752739	-0.115212	-0.184459	-0.0153762	0.0766336	0.0748473	0.224545	5.82513	5.83619	0.011059
Folate receptor alpha (FR-alpha)	96	Goat pAb / Goat pAb	244.141	244.141	62500	8	0.0408533	-0.0450568	-0.0837169	-0.0305506	0.00530438	-0.000307721	0.0175842	3.62401	3.48921	-0.134799
ᵃ Limit of Detection (LOD) is defined as 3 x standard deviations above background
ᵇ Lower limit of quantification (LLOQ) is defined as lowest concentrations measured with coefficient of variance (CV) <30% and relative error (RE) <30%
ᶜ Upper limit of quantification (ULOQ) is defined as highest concentrations measured with coefficient of variance (CV) <30% and relative error (RE) <30%
ᵈ dNPX is calculated as: NPX (mix containing all antigens) - NPX (sub mix containing the specific antigen)
